# Supplementary material for: Intra articular hyaluronic acid in the management of knee osteoarthritis: Pharmaco-economic study from the perspective of the national health insurance system
Source: PubMed Central journal article supplement (PMC5362080; doi:10.1371/journal.pone.0173683), 2017-03-22
Supplement: pone.0173683.s003.pdf [file pone.0173683.s003.pdf]

## Questionnaire for your patient under NSAIDs

### Medico-economical study • Questionnaire T0 - N°1 / 7

|          |                        |                                                                              |
|----------|------------------------|------------------------------------------------------------------------------|
| Part I   | WOMAC                  | Date of control:       /       / 2014                                        |
| Part II  | Health care trajectory | Patient code <sup>1</sup> : _                                                |
| Part III | Quality of Life        | Investigator name initials: _<br>Personalized survey number: "CTPM_IDPHARMA" |

### **PATIENT PROFILE**

#### X-RAY REPORT

Date of report | | | / | | | / 2014

Knee osteoarthritis grade

- 001.  Grade 0: normal
- 002.  Grade 1: possible osteophytic lipping
- 003.  Grade 2: definite osteophytes and doubtful joint space narrowing
- 004.  Grade 3: multiple osteophytes and definite joint space narrowing
- 005.  Grade 4: marked pinched joint space narrowing and sub-chondral bone sclerosis

#### SEX

001.  Man  
002.  Woman

AGE (*mention the right age and nick the corresponding age range*)

/ \_ / year

- 001.  from 40 to 44 years
- 002.  from 45 to 49 years
- 003.  from 50 to 54 years
- 004.  from 55 to 59 years
- 005.  from 60 to 64 years
- 006.  from 65 to 69 years
- 007.  from 70 to 75 years

---

<sup>1</sup> This code is set from:

1. One number indicating the sex (1 for a man and 2 for a woman)
2. Birthday at format DDMMYYYY
3. First letter of first name and first letter of name

Ex: For Thomas DUPONT born on 01/01/1970, patient's code is: 101011970TD

**Decision tree to validate eligibility criteria for patient inclusion in the observatory***To be filled by the health professional, with patient's contribution*

|    |                                                                                                                                         |                         |                          |
|----|-----------------------------------------------------------------------------------------------------------------------------------------|-------------------------|--------------------------|
| 1  | Is the patient aged from 40 to 75 years?                                                                                                | YES<br>Next<br>question | NO<br>STOP<br>INCLUSION  |
| 2  | Is the patient suffering from a grade 2 or 3, symptomatic knee osteoarthritis?                                                          | YES<br>Next<br>question | NO<br>STOP<br>INCLUSION  |
| 3  | Is the patient affected by a bilateral knee osteoarthritis?                                                                             | NO<br>Next<br>question  | YES<br>STOP<br>INCLUSION |
| 4  | Is the patient affected by an infectious or non-infectious knee arthritis?                                                              | NO<br>Next<br>question  | YES<br>STOP<br>INCLUSION |
| 5  | Did the patient receive previously a viscosupplementation treatment?                                                                    | NO<br>Next<br>question  | YES<br>STOP<br>INCLUSION |
| 6  | Did the patient take NSAIDs at least once a month during the last 6 months?                                                             | YES<br>Next<br>question | NO<br>STOP<br>INCLUSION  |
| 7  | Is the patient able to provide an X-ray report dated from less than 6 months, confirming radiological grade of the knee osteoarthritis? | YES<br>Next<br>question | NO<br>STOP<br>INCLUSION  |
| 8  | Does the patient have a WOMAC score at TO, between 30 and 60?                                                                           | YES<br>Next<br>question | NO<br>STOP<br>INCLUSION  |
| 9  | Is the patient able to understand how the study takes place?                                                                            | YES<br>Next<br>question | NO<br>STOP<br>INCLUSION  |
| 10 | Is the patient able to give his written consent to participate to the study?                                                            | YES<br>Next<br>question | NO<br>STOP<br>INCLUSION  |
| 11 | Is the patient geographically stable during the whole study?                                                                            | YES<br>Next<br>question | NO<br>STOP<br>INCLUSION  |

\* *Positive inclusion to participate to the observatory, you can start with the questionnaire to the patient*

**Part I • WOMAC®**

**WOMAC® OSTEOARTHRITIS INDEX**

For each of the domains, qualify<sup>2</sup> the severity of each following item: pain, stiffness and physical function among 5 possible responses: none, mild, moderate, severe or extreme

|                                                                           | None<br>= 0 | Mild<br>= 1 | Moderate<br>= 2 | Severe<br>= 3 | Extreme<br>= 4 |
|---------------------------------------------------------------------------|-------------|-------------|-----------------|---------------|----------------|
| <b>Pain domain: how important is your pain?</b>                           |             |             |                 |               |                |
| 1 – walking on a flat surface?                                            |             |             |                 |               |                |
| 2 – going up or down stairs?                                              |             |             |                 |               |                |
| 3 – at night, while in bed?                                               |             |             |                 |               |                |
| 4 – sitting on, or standing from a chair?                                 |             |             |                 |               |                |
| 5 – standing upright?                                                     |             |             |                 |               |                |
| <b>Stiffness domain: how severe is the stiffness of your joint?</b>       |             |             |                 |               |                |
| 1 – after awaking on morning?                                             |             |             |                 |               |                |
| 2 – after sitting, lying or resting later in the day?                     |             |             |                 |               |                |
| <b>Physical function domain: how important are your difficulties for?</b> |             |             |                 |               |                |
| 1 – descending (going down) stairs?                                       |             |             |                 |               |                |
| 2 – ascending (going up) stairs?                                          |             |             |                 |               |                |
| 3 – rising from sitting?                                                  |             |             |                 |               |                |
| 4 – standing?                                                             |             |             |                 |               |                |
| 5 – bending to floor?                                                     |             |             |                 |               |                |
| 6 – walking on a flat surface?                                            |             |             |                 |               |                |
| 7 – getting in / out of car?                                              |             |             |                 |               |                |
| 8 – going shopping?                                                       |             |             |                 |               |                |
| 9 – putting on socks / stockings?                                         |             |             |                 |               |                |
| 10 – rising from bed?                                                     |             |             |                 |               |                |
| 11 – taking off socks / stockings?                                        |             |             |                 |               |                |
| 12 – lying in bed?                                                        |             |             |                 |               |                |
| 13 – getting in / out of bath?                                            |             |             |                 |               |                |
| 14 – sitting?                                                             |             |             |                 |               |                |
| 15 – getting on / off toilet?                                             |             |             |                 |               |                |
| 16 – heavy domestic duties: doing the housework from top to bottom?       |             |             |                 |               |                |
| 17 – light domestic duties: tidying, dusting, cooking?                    |             |             |                 |               |                |
| <b>TOTAL SCORE</b>                                                        |             |             |                 |               |                |

Source: Bellamy N, Buchanan WW, Goldsmith CH, Campbell J, Stitt LWJ. Validation of WOMAC: a health status instrument for measuring clinically important patient relevant outcomes to antirheumatic drug therapy in patients with osteoarthritis of the hip or knee. J Rheumatol 1995; 15: 1833-40

(2) Qualification of the table:

1. The patient must answer to each question accordingly to a quotation from 0 to 4 in corresponding column, among five possible choices
2. The total score is obtained by adding the results to each question

**Part II • Health care trajectory of the patient**

**A. Hospitalization in relation with knee osteoarthritis during the last 6 months**

1. Have you been hospitalized (one or several nights at hospital) for your knee osteoarthritis, during the last 6 months?

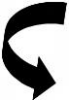

- Yes (continue with question 1a)
- No (go to question 2)

1a. If yes, indicate the dates and the hospital department, where you have been hospitalized for your knee osteoarthritis, during the last 6 months.

|              | Department | Date of arrival | Date of exit | Medical care |
|--------------|------------|-----------------|--------------|--------------|
| Admittance 1 |            | ....././.....   | . / . / .    |              |
| Admittance 2 |            | .. / ./.....    | . / . / .    |              |
| Admittance 3 |            | ....././.....   | . / . / .    |              |
| Admittance 4 |            | ....././.....   | . / . / .    |              |
| Admittance 5 |            | ....././.....   | . / . / .    |              |

2. In relation with your knee osteoarthritis, did you receive one or several outpatient operations (arrival and exit the same day from the health facility), during the last 6 months?

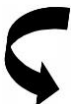

- Yes (continue with question 2a)
- No (go to question 3)

2a. If yes, which medical care did you receive?:

|                | Type of medical care |
|----------------|----------------------|
| Intervention 1 |                      |
| Intervention 2 |                      |
| Intervention 3 |                      |
| Intervention 4 |                      |
| Intervention 5 |                      |

3. How many X-ray examinations did you receive, in relation with knee osteoarthritis during the last 6 months?

Number of X-ray exams: \_\_\_\_\_

**B. Medical consultations in relation with knee osteoarthritis during the last 6 months**

4. In relation with your knee osteoarthritis, did you consult physicians and/or nurses during the last 6 months?

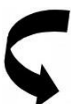

- Yes (continue with question 4a)
- No (go to question 5)

National Observatory for the treatment with NSAIDs and ARTHRUM H 2%, in knee osteoarthritis

4a. If YES to question 4, indicate for each health professional, the specialty, the way of practice and the number of consultations.

|                                |                                                                                                                                                                                                                              |                                                                                                                                                                                                                                                                                 |                                                                                                       |
|--------------------------------|------------------------------------------------------------------------------------------------------------------------------------------------------------------------------------------------------------------------------|---------------------------------------------------------------------------------------------------------------------------------------------------------------------------------------------------------------------------------------------------------------------------------|-------------------------------------------------------------------------------------------------------|
| <i>Health professional # 1</i> | <b>Specialty</b><br><i>(1 answer only allowed)</i><br><input type="checkbox"/> general practitioner<br><input type="checkbox"/> rheumatologist<br><input type="checkbox"/> nurse<br><input type="checkbox"/> other : specify | <b>Way of practice</b><br><i>(1 answer only allowed)</i><br><input type="checkbox"/> private practice<br><input type="checkbox"/> hospital<br><input type="checkbox"/> clinic<br><input type="checkbox"/> mixt : private / salaried<br><input type="checkbox"/> other : specify | <i>Number of consultations in practice location :</i><br><br><i>Number of consultations at home :</i> |
| <i>Health professional # 2</i> | <b>Specialty</b><br><i>(1 answer only allowed)</i><br><input type="checkbox"/> general practitioner<br><input type="checkbox"/> rheumatologist<br><input type="checkbox"/> nurse<br><input type="checkbox"/> other : specify | <b>Way of practice</b><br><i>(1 answer only allowed)</i><br><input type="checkbox"/> private practice<br><input type="checkbox"/> hospital<br><input type="checkbox"/> clinic<br><input type="checkbox"/> mixt : private / salaried<br><input type="checkbox"/> other : specify | <i>Number of consultations in practice location :</i><br><br><i>Number of consultations at home :</i> |
| <i>Health professional # 3</i> | <b>Specialty</b><br><i>(1 answer only allowed)</i><br><input type="checkbox"/> general practitioner<br><input type="checkbox"/> rheumatologist<br><input type="checkbox"/> nurse<br><input type="checkbox"/> other : specify | <b>Way of practice</b><br><i>(1 answer only allowed)</i><br><input type="checkbox"/> private practice<br><input type="checkbox"/> hospital<br><input type="checkbox"/> clinic<br><input type="checkbox"/> mixt : private / salaried<br><input type="checkbox"/> other : specify | <i>Number of consultations in practice location :</i><br><br><i>Number of consultations at home :</i> |
| <i>Health professional # 4</i> | <b>Specialty</b><br><i>(1 answer only allowed)</i><br><input type="checkbox"/> general practitioner<br><input type="checkbox"/> rheumatologist<br><input type="checkbox"/> nurse<br><input type="checkbox"/> other : specify | <b>Way of practice</b><br><i>(1 answer only allowed)</i><br><input type="checkbox"/> private practice<br><input type="checkbox"/> hospital<br><input type="checkbox"/> clinic<br><input type="checkbox"/> mixt : private / salaried<br><input type="checkbox"/> other : specify | <i>Number of consultations in practice location :</i><br><br><i>Number of consultations at home :</i> |
| <i>Health professional # 5</i> | <b>Specialty</b><br><i>(1 answer only allowed)</i><br><input type="checkbox"/> general practitioner<br><input type="checkbox"/> rheumatologist<br><input type="checkbox"/> nurse<br><input type="checkbox"/> other : specify | <b>Way of practice</b><br><i>(1 answer only allowed)</i><br><input type="checkbox"/> private practice<br><input type="checkbox"/> hospital<br><input type="checkbox"/> clinic<br><input type="checkbox"/> mixt : private / salaried<br><input type="checkbox"/> other : specify | <i>Number of consultations in practice location :</i><br><br><i>Number of consultations at home :</i> |

Other paramedical consultations - Ex: physical therapist

5. In relation with your knee osteoarthritis, did you need further health care during the last 6 months, with intervention of other health professionals ?

For instance, as a physical therapist

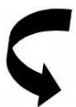

- Yes (continue with question 5a)  
 No (go to question 6)

National Observatory for the treatment with NSAIDs and ARTHRUM H 2%, in knee osteoarthritis

5a. If YES to question 5, indicate the number and the way of consultations, performed with these health professionals during the last 6n months.

| <i>Consultations</i>      | <i>Nb consultations at private practice location, during last 6 months</i> | <i>Nb consultations at home during last 6 months</i> |
|---------------------------|----------------------------------------------------------------------------|------------------------------------------------------|
| <i>Physical therapist</i> |                                                                            |                                                      |
| <i>Osteopath</i>          |                                                                            |                                                      |
| <i>Acupuncturist</i>      |                                                                            |                                                      |
| <i>Other</i>              |                                                                            |                                                      |

Phone consultations following knee osteoarthritis

6. In relation with your knee osteoarthritis, did you use consultations by phone with health professionals, during the last 6 months?

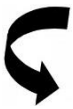

- Yes (continue with question 6a)
- No (go to question 7)

6a. If YES to question 6, how many phone calls did you make for this matter, during the last 6 months?

Also indicate which health professionals were giving their advice.

| <i>Advice given by</i>      | <i>Nb of phone consultations during last 6 months</i> |
|-----------------------------|-------------------------------------------------------|
| <i>General practitioner</i> |                                                       |
| <i>Nurse</i>                |                                                       |
| <i>Rheumatologist</i>       |                                                       |
| <i>Other (specify):</i>     |                                                       |

**C. Drugs** (To be filled together between patient and pharmacist, using the history of deliveries)

7. What are all the drugs taken by your patient during the last 6 months, to treat his knee osteoarthritis?

| <i>Treatments</i> | <i>Dates of delivery</i> | <i>Hours of uptake</i> | <i>Drugs taken on regular base</i> | <i>Drugs taken on patient initiative</i> |
|-------------------|--------------------------|------------------------|------------------------------------|------------------------------------------|
|                   | ...../...../.....        | _ :   _                |                                    |                                          |
|                   | ...../...../.....        | _ :   _                |                                    |                                          |
|                   | ...../...../.....        | _ :   _                |                                    |                                          |
|                   | ...../...../.....        | _ :   _                |                                    |                                          |
|                   | ...../...../.....        | _ :   _                |                                    |                                          |
|                   | ...../...../.....        | _ :   _                |                                    |                                          |
|                   | ...../...../.....        | _ :   _                |                                    |                                          |
|                   | ...../...../.....        | _ :   _                |                                    |                                          |
|                   | ...../...../.....        | _ :   _                |                                    |                                          |
|                   | ...../...../.....        | _ :   _                |                                    |                                          |
|                   | ...../...../.....        | _ :   _                |                                    |                                          |
|                   | ...../...../.....        | _ :   _                |                                    |                                          |
|                   | ...../...../.....        | _ :   _                |                                    |                                          |
|                   | ...../...../.....        | _ :   _                |                                    |                                          |
|                   | ...../...../.....        | _ :   _                |                                    |                                          |

For information, non-exhaustive list of specialty classes often prescribed in knee osteoarthritis:

- *Per os analgesics*
- *Local analgesics*
- *Psychotropic drug*
- *Hormone replacement therapy*
- *Dietary supplements*
- *Vitamins and mineral salts*

**D. Medical devices and life help equipment** (To be filled together between patient and pharmacist)

8. In relation with your knee osteoarthritis, did you use medical devices or life help equipment, during the last 6 months?

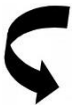

- Yes (continue with question 8a)
- No (go to question 9)

8a. If YES to question 8, indicate the type of medical devices or life help equipment, the total cost of it and the remaining charge to the patient.

| Medical devices and life help equipment          | Renting (YES / NO) | Cost in € | Remaining charge to the patient in € |
|--------------------------------------------------|--------------------|-----------|--------------------------------------|
| Soft sole shoes                                  | X                  |           |                                      |
| Orthosis adapted to the knee                     | X                  |           |                                      |
| Use of a stick                                   |                    |           |                                      |
| Aid with a walking frame                         |                    |           |                                      |
| Elevator for person with reduced mobility - lift |                    |           |                                      |
| Medical bed                                      |                    |           |                                      |
| Wheelchair                                       |                    |           |                                      |
| Other (specify) :                                |                    |           |                                      |
| Other (specify) :                                |                    |           |                                      |

**E. Social services and others, in relation with knee osteoarthritis**

9. During the last 6 months, did you stay in a rest home, a retirement home, for a water cure or in another housing structure, in relation with the care of your knee osteoarthritis?

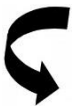

- Yes (continue with question 9a)
- No (go to question 10)

9a. If YES to question 9, how many days did you stay in these structures during the last 6 months ?

| Housing         | Nb of days, during last 6 months | Cost in € | Remaining charge to the patient in € |
|-----------------|----------------------------------|-----------|--------------------------------------|
| Water cure      |                                  |           |                                      |
| Rest home       |                                  |           |                                      |
| Retirement home |                                  |           |                                      |
| Other kind :    |                                  |           |                                      |
| Other kind :    |                                  |           |                                      |
| Other kind :    |                                  |           |                                      |

10. In relation with your knee osteoarthritis care, did you need home help services, during the last 6 months?

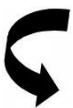

- Yes (continue with question 10a)
- No (go to question 11)

10a. If YES to question 10, indicate the number of hours per months and the number of months

\_\_\_\_\_ Hours / month, over \_\_\_\_\_ months

11. In relation with your knee osteoarthritis care, did you need to use medical transportation, during the last 6 months?

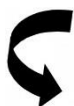

- Yes (continue with question 11a)
- No (go to question 12)

11a. If YES to question 11, indicate the number of hours per month and the number of months concerned

| <b>Transportation</b>                 | <b>Nb of months</b> | <b>Nb of hours</b> | <b>Remaining charge to the patient in €</b> |
|---------------------------------------|---------------------|--------------------|---------------------------------------------|
| <i>Individual transport</i>           |                     |                    |                                             |
| <i>Public transport</i>               |                     |                    |                                             |
| <i>Approved taxis for sick people</i> |                     |                    |                                             |
| <i>Ambulance transport</i>            |                     |                    |                                             |
| <i>Other transport :</i>              |                     |                    |                                             |
| <i>Other transport :</i>              |                     |                    |                                             |

**F. Questions relative to employment**

12. What is your actual professional situation ?

- Active (salaried, employee, liberal profession...) (continue with questions 12a and 12b)
  - Retired
  - Invalid
  - Un-employed
  - Non- active
  - Other \_\_\_\_\_
- } (go to question 13)

12a. Do you work at :

- Full time
- Partial time: Equivalent percentage to full time: \_\_\_\_\_%

12b. In relation with your knee osteoarthritis, how many days of did you get for sick leave, during the last 6 months?

Number of sick leave days: \_\_\_\_\_

**G. Investments and help tools**

13. During the last 6 months, did you make works to modify your home or your car, or did you need specific equipments or tool helps to overcome the handicap, following your knee osteoarthritis ?

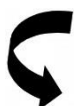

- Yes (continue with question 13a)
- No (go to Part III)

13a. If YES to question 13, type of investments, total cost of them and remaining share to the patient.

|                                                                                                      | <b>Total cost in €</b> | <b>Remaining charge to the patient in €</b> |
|------------------------------------------------------------------------------------------------------|------------------------|---------------------------------------------|
| <i>Elevator for person with reduced mobility - lift</i>                                              |                        |                                             |
| <i>Ramps, bars, handrails</i>                                                                        |                        |                                             |
| <i>Other modifications to your home (kitchen, bathroom, bed, alarm...)</i>                           |                        |                                             |
| <i>Tools and special aids (to write, to make cooking, for personal hygiene, to dress oneself...)</i> |                        |                                             |
| <i>Other :</i>                                                                                       |                        |                                             |



### Part III • Quality of life

*To be filled by the patient*

By placing a tick in one box in each group below, please indicate which statements best describe your own health state today.

#### **Mobility**

- 001. I have no problem in walking about
- 002. I have some problems in walking about
- 003. I am confined to bed

#### **Self-Care**

- 001. I have no problem with self-care
- 002. I have some problems washing or dressing my-self
- 003. I am unable to wash or dress myself

#### **Usual activities** (e.g. work, study, housework, family or leisure activities)

- 001. I have no problem with performing my usual activities
- 002. I have some problems with performing my usual activities
- 003. I am unable to perform my usual activities

#### **Pain / Discomfort**

- 001. I have no pain or discomfort
- 002. I have moderate pain or discomfort
- 003. I have extreme pain or discomfort

#### **Anxiety / Depression**

- 001. I am not anxious or depressed
- 002. I am moderately anxious or depressed
- 003. I am extremely anxious or depressed

#### **How would you qualify your health state today, on a scale 0 to 100?**

Indicate your answer and tick the corresponding box.

#### **0 (Worst imaginable health state) and 100 (Best imaginable health state):**

\_\_\_\_\_ / Health state

- 001.  From 01 to 10
- 002.  From 11 to 20
- 003.  From 21 to 30
- 004.  From 31 to 40
- 005.  From 41 to 50
- 006.  From 51 to 60
- 007.  From 61 to 70
- 008.  From 71 to 80
- 009.  From 81 to 90
- 010.  From 91 to 100

End of visit — We answer you for your participation -  
The next questionnaire to be filled with your patient will be T1 N° 2 / 7
